# Supplementary material for: β-Elemene Suppresses Obesity-Induced Imbalance in the Microbiota-Gut-Brain Axis
Source: MDPI journal article supplement (doi:10.3390/biomedicines9070704), 2021-06-22
Supplement: s1 [file s1]

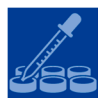

## Article

# $\beta$ -Elemene Suppresses Obesity-Induced Imbalance in the Microbiota-Gut-Brain Axis

Yingyu Zhou <sup>1,2</sup>, Wanyi Qiu <sup>1</sup>, Yimei Wang <sup>1,2</sup>, Rong Wang <sup>1,2</sup>, Tomohiro Takano <sup>1,2</sup>, Xuyang Li <sup>1</sup>, Zhangliang Zhu <sup>1,3</sup>, Haruyo Nakajima-Adachi <sup>2</sup>, Masaru Tanokura <sup>1,2,\*</sup>, Satoshi Hachimura <sup>2,\*</sup> and Takuya Miyakawa <sup>1,\*</sup>

## Supplementary materials

Table S1. Chemical shifts of the metabolites.

|     | Metabolite                                                                               | <sup>1</sup> H chemical shift (ppm)        |
|-----|------------------------------------------------------------------------------------------|--------------------------------------------|
| 1.  | Lactate (Lac, C <sub>3</sub> H <sub>6</sub> O <sub>3</sub> )                             | 1.32, 4.10                                 |
| 2.  | Succinate (Suc, C <sub>4</sub> H <sub>6</sub> O <sub>4</sub> )                           | 2.39                                       |
| 3.  | Alanine (Ala, C <sub>3</sub> H <sub>7</sub> NO <sub>2</sub> )                            | 1.47, 3.77                                 |
| 4.  | Aspartate (Asp, C <sub>4</sub> H <sub>7</sub> NO <sub>4</sub> )                          | 2.70, 2.79, 3.89                           |
| 5.  | Glycine (Gly, C <sub>2</sub> H <sub>5</sub> NO <sub>2</sub> )                            | 3.55                                       |
| 6.  | Myo-Inositol (Mins, C <sub>6</sub> H <sub>12</sub> O <sub>6</sub> )                      | 3.26, 3.52, 3.61, 4.05                     |
| 7.  | Taurine (Tau, C <sub>2</sub> H <sub>7</sub> NO <sub>3</sub> S)                           | 3.25, 3.41                                 |
| 8.  | Acetate (Ace, C <sub>2</sub> H <sub>4</sub> O <sub>2</sub> )                             | 1.91                                       |
| 9.  | $\gamma$ -Aminobutyric acid (GABA, C <sub>4</sub> H <sub>9</sub> NO <sub>2</sub> )       | 1.89, 2.29, 3.00                           |
| 10. | N-acetyl aspartate (NAA, C <sub>6</sub> H <sub>9</sub> NO <sub>5</sub> )                 | 2.01, 2.48, 2.68, 4.38                     |
| 11. | Propionate (Pro, C <sub>3</sub> H <sub>6</sub> O <sub>2</sub> )                          | 1.04, 2.17                                 |
| 12. | Butyrate (But, C <sub>4</sub> H <sub>8</sub> O <sub>2</sub> )                            | 0.88, 1.55, 2.14                           |
| 13. | Serotonin (5-HT, C <sub>10</sub> H <sub>12</sub> N <sub>2</sub> O)                       | 3.11, 3.31, 6.88, 7.11, 7.29, 7.420, 10.00 |
| 14. | Creatine (Cr, C <sub>4</sub> H <sub>9</sub> N <sub>3</sub> O <sub>2</sub> )              | 3.02, 3.92                                 |
| 15. | Creatine phosphate (PCr, C <sub>4</sub> H <sub>10</sub> N <sub>3</sub> O <sub>5</sub> P) | 3.03, 3.94                                 |
| 16. | Choline (Cho, C <sub>5</sub> H <sub>14</sub> NO)                                         | 3.20, 3.51, 4.05                           |
| 17. | Choline phosphate (PCho, C <sub>4</sub> H <sub>10</sub> N <sub>3</sub> O <sub>5</sub> P) | 3.21, 3.58, 4.16                           |
| 18. | Glutamate (Glu, C <sub>5</sub> H <sub>9</sub> NO <sub>4</sub> )                          | 2.08, 2.34, 3.75                           |
| 19. | Glutamine (Gln, C <sub>5</sub> H <sub>10</sub> N <sub>2</sub> O <sub>3</sub> )           | 2.13, 2.45                                 |

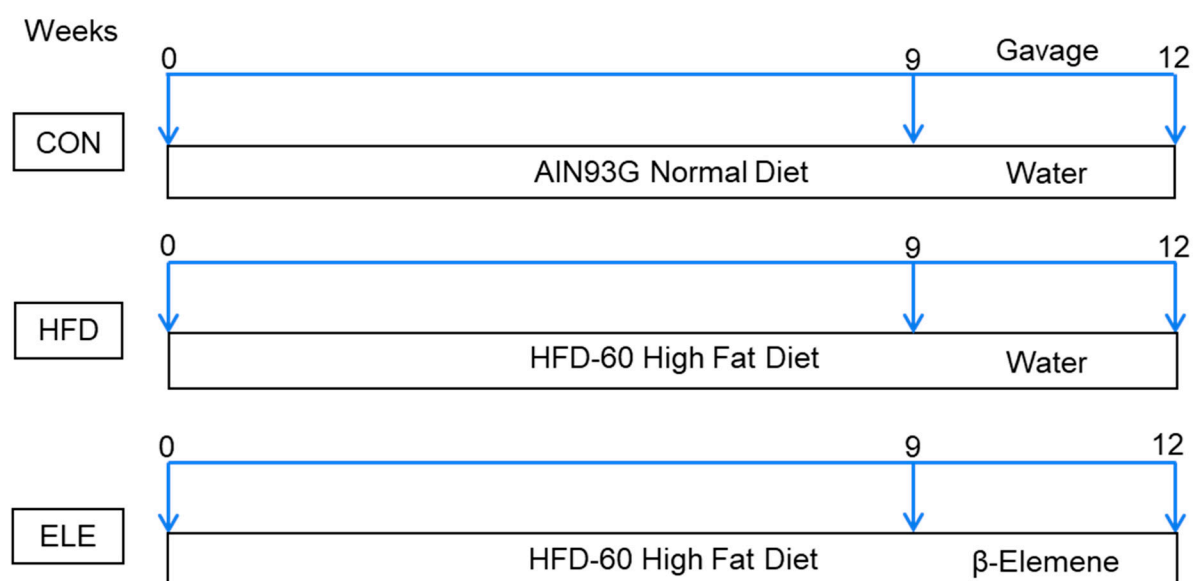

**Figure S1.** Schedule of the obesity mouse model.

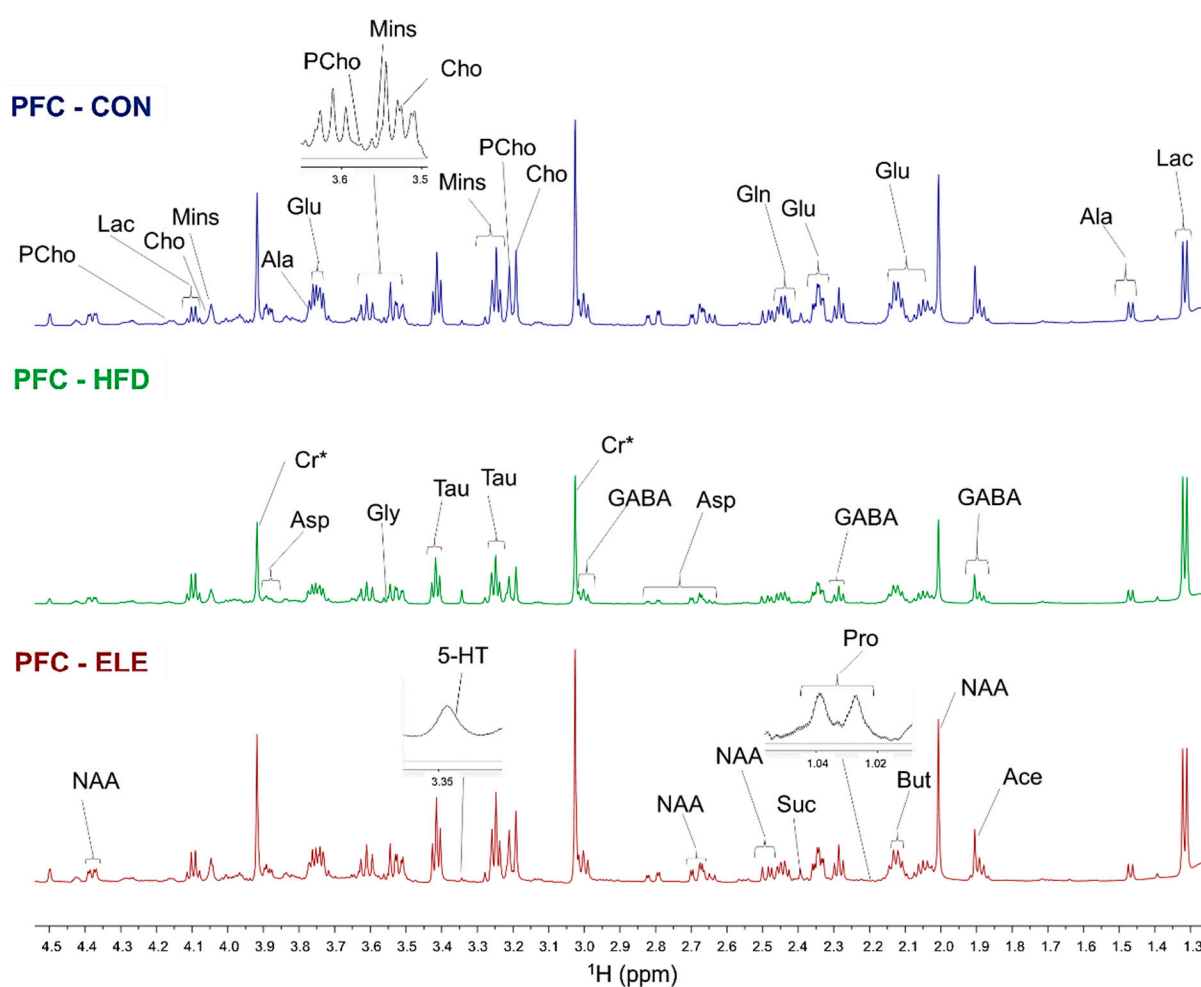

**Figure S2.** Representative  $^1\text{H}$  NMR spectra of the PFC of each mice group. Cr\*, Cr + PCr; CON, normal diet; HFD, high-fat diet; and ELE, HFD-induced obese mice under treatment with  $\beta$ -elementene.

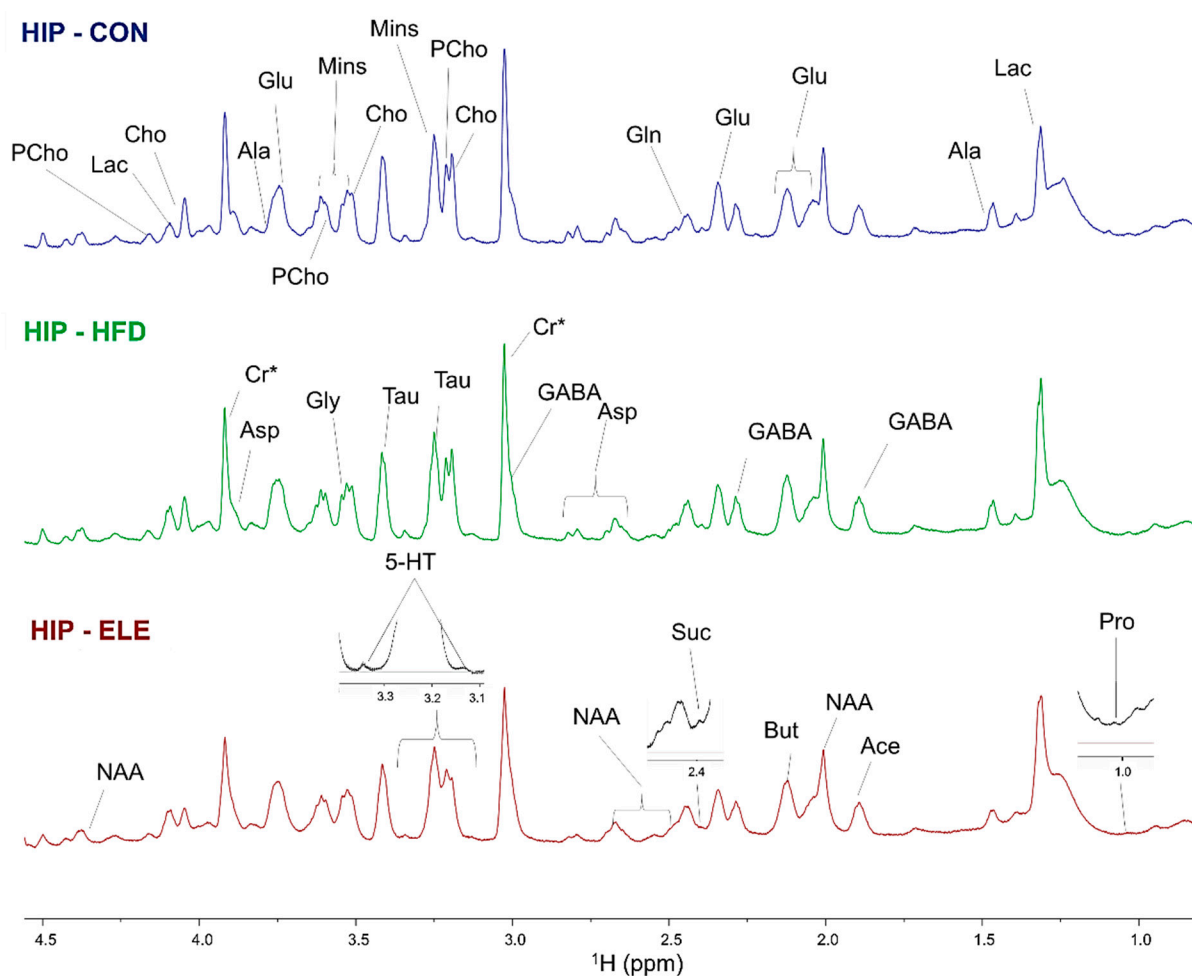

**Figure S3.** Representative  $^1\text{H}$  NMR spectra of the HIP of each mice group. Cr\*, Cr + PCr; CON; normal diet; HFD, high-fat diet; and ELE, HFD-induced obese mice under treatment with  $\beta$ -elemene.

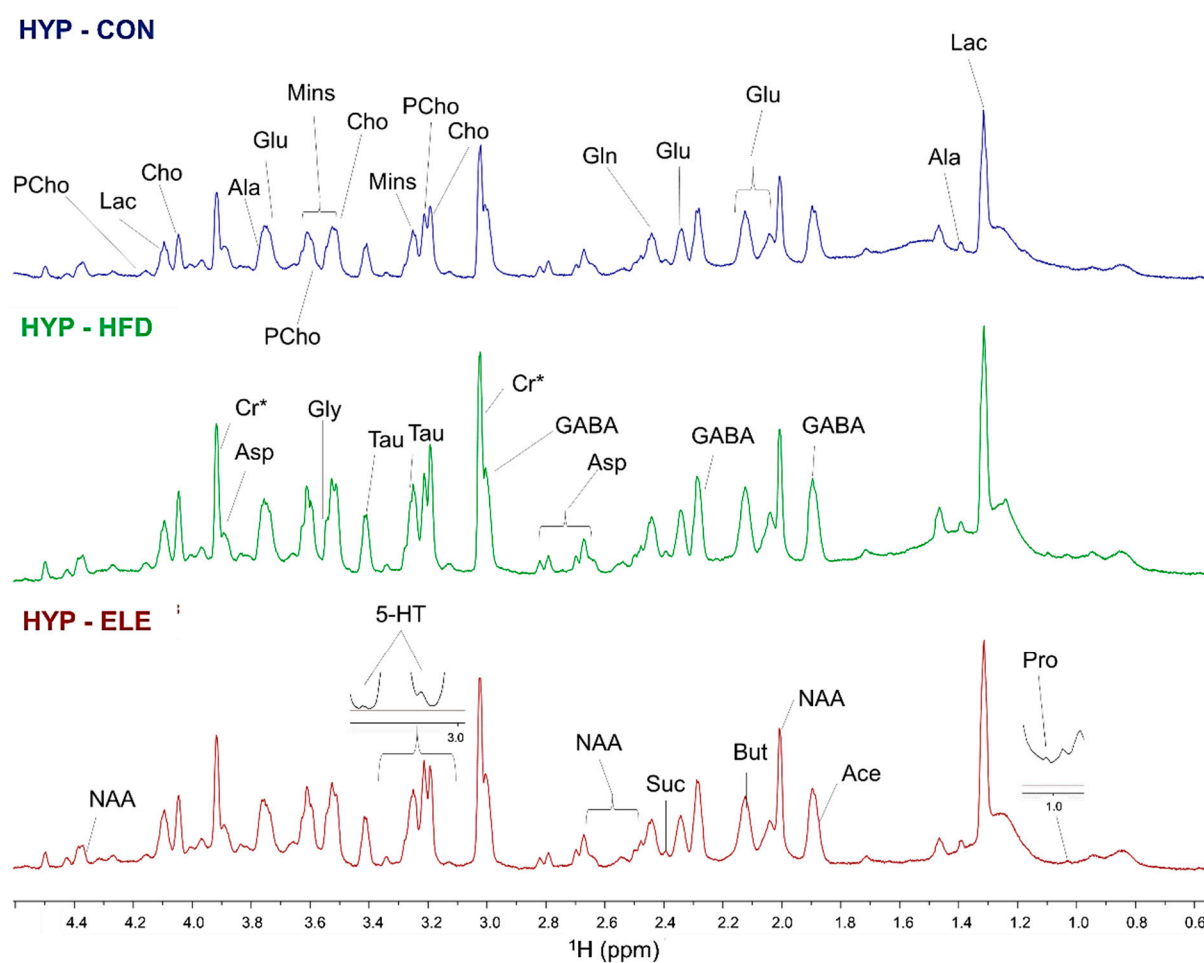

**Figure S4.** Representative  $^1\text{H}$  NMR spectra of the HYP of each mice group. Cr\*, Cr + PCr; CON, normal diet; HFD, high-fat diet; and ELE, HFD-induced obese mice under treatment with  $\beta$ -elemene.

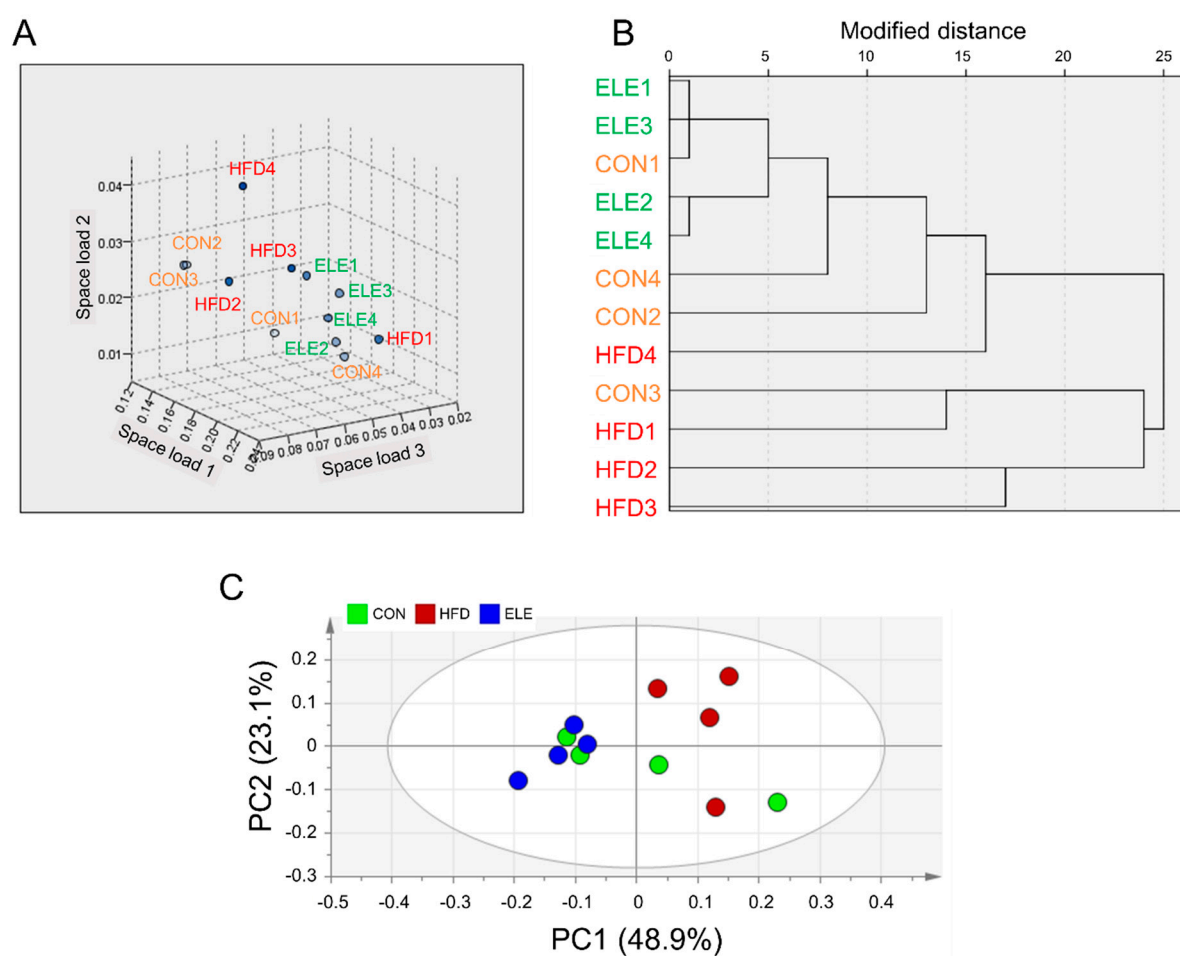

**Figure S5.** Effect of  $\beta$ -elemene on regulating brain metabolites in obese mice based on cluster analysis and principal component analysis. **(A)** Nearest neighbor analysis of the HYP. **(B)** Hierarchical cluster analysis of the HYP. **(C)** PCA score plot of the HYP. The spots with same color are derived from the same kind of samples. CON, normal diet; HFD, high-fat diet; and ELE, HFD-induced obese mice under treatment with  $\beta$ -elemene. Cr\*, Cr + PCr; Cho\*, Cho + PCho; and Glx, Glu + Gln.
